# Supplementary material
Source: PubMed Central journal article supplement (PMC4237974)
Supplement: supp_dc14-0874v140874_DC140874SupplementaryData.pdf [file supp_dc14-0874v140874_DC140874SupplementaryData.pdf]

SUPPLEMENTARY DATA

**Supplementary Table 1.** Codes Used for Analysis

Comorbidity Categories

| New Category                | Sub-Category                | Source                                              | Code                                                                                                                                                                                                                                                                                                                                                                                                                       |
|-----------------------------|-----------------------------|-----------------------------------------------------|----------------------------------------------------------------------------------------------------------------------------------------------------------------------------------------------------------------------------------------------------------------------------------------------------------------------------------------------------------------------------------------------------------------------------|
| Hypertension                |                             | Outpatient Diagnoses or Pharmacy Dispensings        | ICD-9 401-404 or at least 1 dispensing of any of the following medication classes in the 12 months pre-baseline:<br>ACE-Inhibitors<br>Alpha Blockers<br>Alpha adrenergic agonists<br>Angiotensin antagonists<br>Beta adrenergic blockers<br>Carbonic anhydrase inhibitors<br>Calcium channel blockers<br>Thiazides/related diuretics<br>Potassium sparing diuretics<br>Loop diuretics<br>Osmotic diuretics<br>Vasodilators |
| Hyperlipidemia              |                             | Outpatient Diagnoses or LDL or Pharmacy Dispensings | ICD9 272 or Ezetimibe<br>Fibrates<br>Niacin<br>Bile acid resins<br>Statins<br>LDL > 130 mg/dL                                                                                                                                                                                                                                                                                                                              |
| Cardiovascular disease      | Myocardial infarction       | Inpatient                                           | 410, 411                                                                                                                                                                                                                                                                                                                                                                                                                   |
|                             | Coronary artery disease     | Outpatient                                          | 410-413, 414.01-07, 414.2, 414.3, 414.8, 414.9                                                                                                                                                                                                                                                                                                                                                                             |
|                             | Stroke                      | Inpatient                                           | 431, 433-5                                                                                                                                                                                                                                                                                                                                                                                                                 |
|                             | Cerebrovascular disease     | Outpatient                                          | 433-8                                                                                                                                                                                                                                                                                                                                                                                                                      |
| Diabetic retinopathy        |                             | Outpatient                                          | 250.5, 362.1, 361, 369, 362.01, 362.83, 362.53, 362.81, 362.82, 362.02, 379.23                                                                                                                                                                                                                                                                                                                                             |
| Diabetic neuropathy         |                             | Outpatient                                          | 356.9, 250.6, 358.1, 951.0, 951.1, 951.3, 713.5, 357.2, 337.0, 337.1, 564.5, 536.3, 458.0, 354.0, 354.1, 354.2, 354.3, 354.4, 354.5, 354.6, 354.7, 354.8, 354.9, 355.0, 355.1, 355.2, 355.3, 355.4, 355.5, 355.6, 355.7, 355.8, 355.9                                                                                                                                                                                      |
| Peripheral vascular disease | Peripheral vascular disease | Outpatient                                          | 440-442, 443.9, 250.7                                                                                                                                                                                                                                                                                                                                                                                                      |
|                             | Lower extremity Amputation  | Outpatient and inpatient                            | 84.10-84.19, 27290, 27295, 27598, 27880-27882, 27884, 27886, 27888, 27889, 28800, 28805, 28810, 28820, 28825                                                                                                                                                                                                                                                                                                               |
|                             | Foot ulcer                  | Outpatient and inpatient                            | 249.80-249.81, 250.80-250.83, 707.1                                                                                                                                                                                                                                                                                                                                                                                        |
| Congestive heart failure    |                             | Inpatient                                           | 402.01, 402.11, 402.91, 428                                                                                                                                                                                                                                                                                                                                                                                                |
|                             |                             | Outpatient                                          | 428                                                                                                                                                                                                                                                                                                                                                                                                                        |
| Obesity                     |                             | Inpatient or Outpatient visits                      | Last recorded BMI prior to baseline                                                                                                                                                                                                                                                                                                                                                                                        |

SUPPLEMENTARY DATA

Metabolic/Bariatric Surgery Procedure Codes

| <b>Description</b>                                                                                    | <b>Source</b> | <b>Code</b> |
|-------------------------------------------------------------------------------------------------------|---------------|-------------|
| Open RYGB                                                                                             | CPT4          | 43621       |
| RGYB                                                                                                  | CPT4          | 43633       |
| Lap RYGB                                                                                              | CPT4          | 43644       |
| Lap RYGB                                                                                              | CPT4          | 43645       |
| Gastric Sleeve                                                                                        | CPT4          | 43659       |
| Lap adjustable gastric band                                                                           | CPT4          | 43770       |
| Lap Band Revision                                                                                     | CPT4          | 43771       |
| Lap Band Removal                                                                                      | CPT4          | 43772       |
| Lap Band Replacement                                                                                  | CPT4          | 43773       |
| Lap Band Removal                                                                                      | CPT4          | 43774       |
| Lap Gastric Sleeve (after 1/2010)                                                                     | CPT4          | 43775       |
| Vertical banded gastroplasty                                                                          | CPT4          | 43842       |
| Vertical banded gastroplasty                                                                          | CPT4          | 43843       |
| Lap RYGB (code dropped in 1995)                                                                       | CPT4          | 43844       |
| Biliopancreatic diversion with duodenal switch                                                        | CPT4          | 43845       |
| Open RYGB                                                                                             | CPT4          | 43846       |
| Open RYGB                                                                                             | CPT4          | 43847       |
| Revision/Complication (not lap band)                                                                  | CPT4          | 43848       |
| Revision of GJ anastomosis with reconstruction, with or without vagotomy                              | CPT4          | 43850       |
| Revision of GJ anastomosis with reconstruction, with or without partial gastrectomy; without vagotomy | CPT4          | 43860       |
| Revision of GJ anastomosis with reconstruction, with or without partial gastrectomy; with vagotomy    | CPT4          | 43865       |
| Open Band Port Revision                                                                               | CPT4          | 43886       |
| Open Band Port Removal                                                                                | CPT4          | 43887       |
| Open Band Port Replacement                                                                            | CPT4          | 43888       |
| Gastric Sleeve                                                                                        | CPT4          | 43999       |
| Gastric Sleeve (often done as 1st step to BPD)                                                        | ICD9          | 43.89       |
| Open RYGB                                                                                             | ICD9          | 44.31       |
| Lap RYGB                                                                                              | ICD9          | 44.38       |
| Open RYGB                                                                                             | ICD9          | 44.39       |
| Vertical banded gastroplasty                                                                          | ICD9          | 44.68       |
| Other Bariatric Procedure                                                                             | ICD9          | 44.69       |
| Lap adjustable gastric band                                                                           | ICD9          | 44.95       |
| Lap Band Revision                                                                                     | ICD9          | 44.96       |
| Lap Band Removal                                                                                      | ICD9          | 44.97       |
| Lap Band Adjustment                                                                                   | ICD9          | 44.98       |
| Lap Band                                                                                              | ICD9          | S2082       |
| Lap Band Adjustment                                                                                   | ICD9          | S2083       |
| Lap RYGB                                                                                              | ICD9          | S2085       |

SUPPLEMENTARY DATA

**Supplementary Table 2.** New onset cohort- unadjusted and adjusted cox proportional hazard ratios for any remission

| Characteristic                                       | Any Remission (n=776) |                       |         |                    |         |
|------------------------------------------------------|-----------------------|-----------------------|---------|--------------------|---------|
|                                                      | No. (row %)           | Hazard Ratio (95% CI) |         |                    |         |
|                                                      |                       | Unadjusted            | P-value | Full*              | P-Value |
| Men                                                  | 351 (3.6)             | 1.0 [Ref]             |         | 1.0 [Ref]          |         |
| Women                                                | 425 (4.9)             | 1.39 (1.2,1.6)        | <.0001  | 1.09 (0.89,1.34)   | 0.408   |
| Age                                                  |                       |                       |         |                    |         |
| - <45                                                | 56 (1.7)              | 1.0 [Ref]             |         | 1.0 [Ref]          |         |
| - 45-64                                              | 288 (2.9)             | 1.71 (1.28,2.28)      | 0.0002  | 1.85 (1.1,3.11)    | 0.0208  |
| - ≥65                                                | 432 (8.6)             | 5.38 (4.07,7.11)      | <.0001  | 2.9 (1.66,5.07)    | 0.0002  |
| Race/Ethnicity                                       |                       |                       |         |                    |         |
| - White                                              | 312 (4)               | 1.0 [Ref]             |         | 1.0 [Ref]          |         |
| - African American                                   | 65 (3.8)              | 0.93 (0.71,1.21)      | 0.5765  | 1.42 (1.01,1.99)   | 0.0424  |
| - Asian                                              | 62 (3.5)              | 0.84 (0.64,1.11)      | 0.2211  | 0.83 (0.58,1.19)   | 0.3088  |
| - Filipino                                           | 33 (2.3)              | 0.55 (0.38,0.78)      | 0.001   | 0.66 (0.43,1.03)   | 0.0672  |
| - Latino                                             | 62 (2.2)              | 0.55 (0.42,0.73)      | <.0001  | 0.96 (0.68,1.35)   | 0.8239  |
| - Mixed Race                                         | 36 (4.4)              | 1.09 (0.77,1.54)      | 0.6293  | 1.17 (0.77,1.77)   | 0.4575  |
| - Other                                              | 11 (4.4)              | 1.13 (0.62,2.06)      | 0.6872  | 1.56 (0.69,3.53)   | 0.2887  |
| Socioeconomic Status: Neighborhood deprivation index |                       |                       |         |                    |         |
| - 1 <sup>st</sup> quartile (least deprived)          | 195 (6)               | 1.97 (1.55,2.5)       | <.0001  | 1.48 (1.04,2.11)   | 0.0286  |
| - 2 <sup>nd</sup> quartile                           | 234 (4.6)             | 1.52 (1.2,1.91)       | 0.0004  | 1.31 (0.93,1.84)   | 0.1165  |
| - 3 <sup>rd</sup> quartile                           | 201 (3.9)             | 1.31 (1.03,1.66)      | 0.0265  | 1.19 (0.84,1.68)   | 0.3314  |
| - 4 <sup>th</sup> quartile (most deprived)           | 102 (3)               | 1.0 [Ref]             |         | 1.0 [Ref]          |         |
| Baseline A1c (%) [mmol/mol]                          |                       |                       |         |                    |         |
| - <5.7% [<39 mmol/mol]                               | 79 (6.2)              | 11.01 (6.74,17.99)    | <.0001  | 13.14 (6.58,26.23) | <.0001  |
| - 5.7-6.4% [39-46 mmol/mol]                          | 283 (5.5)             | 9.68 (6.15,15.24)     | <.0001  | 5.49 (2.87,10.48)  | <.0001  |
| - 6.5-7.9% [47-63 mmol/mol]                          | 390 (4.8)             | 8.38 (5.35,13.14)     | <.0001  | 1.96 (1.03,3.74)   | 0.0408  |

SUPPLEMENTARY DATA

|                                   |            |                       |        |                  |        |
|-----------------------------------|------------|-----------------------|--------|------------------|--------|
| - $\geq$ 8% [ $\geq$ 64 mmol/mol] | 20 (0.6)   | 1.0 [Ref]             |        | 1.0 [Ref]        |        |
| Diabetes medication (past 1 yr)   |            |                       |        |                  |        |
| - None                            | 679 (13.4) | 24.85<br>(10.31,59.9) | <.0001 | 25.8 (8.2,81.23) | <.0001 |
| - Oral agent(s) only              | 92 (0.7)   | 1.29 (0.53,3.18)      | 0.5747 | 1.52 (0.48,4.87) | 0.4786 |
| - Any insulin                     | 5 (0.6)    | 1.0 [Ref]             |        | 1.0 [Ref]        |        |
| BMI                               |            |                       |        |                  |        |
| - <25                             | 95 (5.9)   | 1.82 (1.4,2.36)       | <.0001 | 1.2 (0.85,1.7)   | 0.3053 |
| - 25-30                           | 207 (5)    | 1.5 (1.21,1.86)       | 0.0002 | 1.03 (0.78,1.36) | 0.847  |
| - 30-35                           | 131 (3.6)  | 1.07 (0.85,1.36)      | 0.5601 | 0.82 (0.62,1.1)  | 0.1903 |
| - $\geq$ 35                       | 141 (3.4)  | 1.0 [Ref]             |        | 1.0 [Ref]        |        |
| CKD stage                         |            |                       |        |                  |        |
| - Stage 0+1                       | 187 (2.4)  | 1.0 [Ref]             |        | 1.0 [Ref]        |        |
| - Stage 2                         | 362 (4.9)  | 2.04 (1.71,2.43)      | <.0001 | 0.97 (0.74,1.27) | 0.8332 |
| - Stage 3                         | 171 (7.9)  | 3.41 (2.77,4.2)       | <.0001 | 1.17 (0.84,1.65) | 0.3505 |
| - Stage 4                         | 14 (12.7)  | 6.25<br>(3.63,10.76)  | <.0001 | 2.34 (1.04,5.22) | 0.0389 |
| - Stage 5                         | 1 (20)     | 8.78<br>(1.24,62.16)  | 0.0297 | 1.33 (0.18,9.97) | 0.7829 |
| No hypertension                   | 133 (2.8)  | 0.58 (0.48,0.7)       | <.0001 | 0.91 (0.67,1.22) | 0.5131 |
| Hypertension                      | 643 (4.7)  | 1.0 [Ref]             |        | 1.0 [Ref]        |        |
| No dyslipidemia                   | 224 (4.3)  | 1.05 (0.9,1.23)       | 0.5181 | 1.38 (1.09,1.75) | 0.0069 |
| Dyslipidemia                      | 552 (4.2)  | 1.0 [Ref]             |        | 1.0 [Ref]        |        |
| No cardiovascular disease         | 643 (3.9)  | 0.6 (0.5,0.73)        | <.0001 | 0.85 (0.64,1.13) | 0.2755 |
| Cardiovascular disease            | 133 (6.2)  | 1.0 [Ref]             |        | 1.0 [Ref]        |        |
| No diabetic retinopathy           | 756 (4.3)  | 1.51 (0.97,2.35)      | 0.0711 | 1.18 (0.61,2.3)  | 0.6278 |
| Diabetic retinopathy              | 20 (2.8)   | 1.0 [Ref]             |        | 1.0 [Ref]        |        |
| No diabetic neuropathy            | 679 (4.1)  | 0.77 (0.62,0.95)      | 0.0142 | 0.85 (0.62,1.16) | 0.3013 |
| Diabetic neuropathy               | 97 (5.2)   | 1.0 [Ref]             |        | 1.0 [Ref]        |        |
| No congestive heart failure       | 725 (4.1)  | 0.52 (0.39,0.69)      | <.0001 | 0.91 (0.6,1.37)  | 0.6387 |
| Congestive heart failure          | 51 (7.2)   | 1.0 [Ref]             |        | 1.0 [Ref]        |        |

\*Fully-adjusted model includes all variables listed in the table above
